# Supplementary material
Source: PubMed Central journal article supplement (PMC2999966)
Supplement: jc.2010-0730_1.pdf [file jc.2010-0730_1.pdf]

## ONLINE APPENDIX

**Fransson EI, Batty GD, Tabak AG, Brunner EJ, Kumari M, Shipley MJ, Singh-Manoux A, Kivimäki M. Association between change in body composition and change in inflammatory markers: An 11-year follow-up in the Whitehall II study. *Journal of Clinical Endocrinology & Metabolism.***

SUPPLEMENTAL TABLE 1. Characteristics of the eligible Whitehall II study population at baseline (phase three, 1991-1993) and the study participants with complete data from baseline and follow-up (phase seven, 2002-2004).

|                                             | Baseline population<br>n=8815 | Study participants<br>n=3522 |
|---------------------------------------------|-------------------------------|------------------------------|
| Gender [n (%)]                              |                               |                              |
| Men                                         | 6057 (69)                     | 2496 (71)                    |
| Women                                       | 2758 (31)                     | 1026 (29)                    |
| Age years [mean (S.D.)]                     | 49.8 (6.1)                    | 49.4 (6.0)                   |
| Ethnicity [n (%)]                           |                               |                              |
| White                                       | 7969 (91)                     | 3224 (92)                    |
| South Asian                                 | 452 (5)                       | 168 (5)                      |
| Black                                       | 287 (3)                       | 96 (3)                       |
| Other                                       | 67 (1)                        | 31 (1)                       |
| Civil Service Grade [n (%)]                 |                               |                              |
| High                                        | 3172 (38)                     | 1441 (41)                    |
| Intermediate                                | 3743 (45)                     | 1606 (46)                    |
| Low                                         | 1397 (17)                     | 438 (13)                     |
| Smoking [n (%)]                             |                               |                              |
| Never-smoker                                | 4152 (51)                     | 1825 (53)                    |
| Ex-smoker                                   | 2842 (35)                     | 1226 (36)                    |
| Current smoker                              | 1145 (14)                     | 383 (11)                     |
| Exercise level [n (%)]                      |                               |                              |
| High                                        | 2431 (29)                     | 1107 (32)                    |
| Low                                         | 5885 (71)                     | 2382 (68)                    |
| CHD up to and including phase three [n (%)] |                               |                              |
| No                                          | 8035 (91)                     | 3256 (92)                    |
| Yes                                         | 780 (9)                       | 266 (8)                      |
| Diabetes type 2 at phase three [n (%)]      |                               |                              |
| No                                          | 8563 (97)                     | 3444 (98)                    |
| Yes                                         | 252 (3)                       | 78 (2)                       |
| Weight <i>kg</i> [mean (S.D.)]              | 74.9 (12.7)                   | 74.4 (12.2)                  |
| BMI <i>kg/m<sup>2</sup></i> [mean (S.D.)]   | 25.3 (3.7)                    | 25.0 (3.6)                   |
| Waist circumference <i>cm</i> [mean (S.D.)] | 85.9 (11.6)                   | 85.1 (11.3)                  |

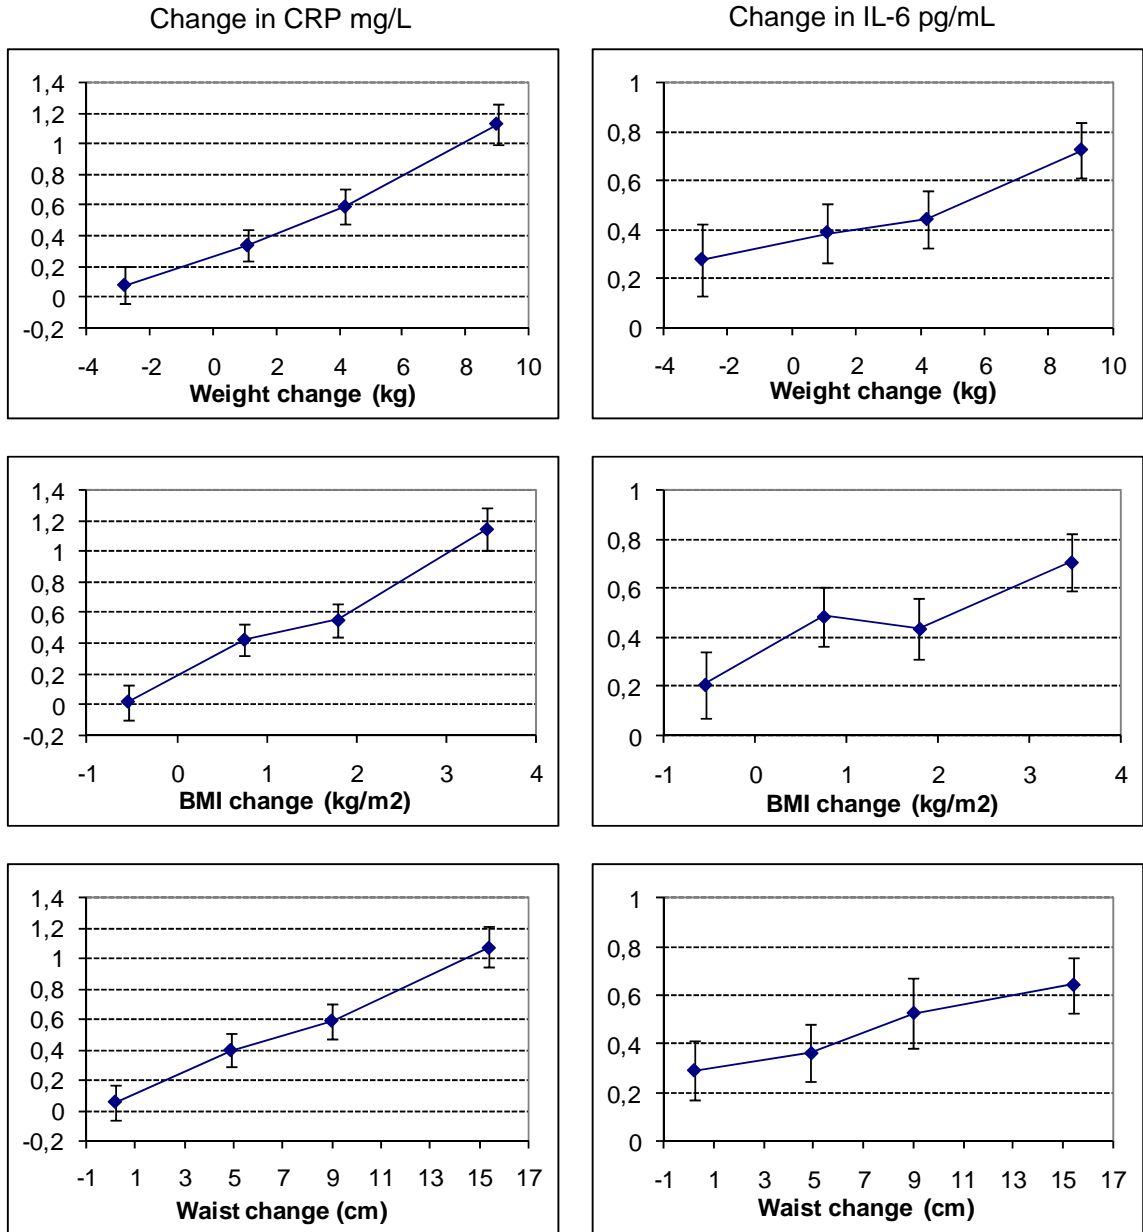

SUPPLEMENTAL FIGURE 1. Mean change with 95% confidence intervals in CRP (left) and IL-6 (right) over the study period, by quartiles of change in weight (top), body mass index (middle), and waist circumference (bottom).
